# Supplementary material
Source: PubMed Central journal article supplement (PMC7051965)
Supplement: 41423_2019_305_MOESM2_ESM.pdf [file 41423_2019_305_MOESM2_ESM.pdf]

Table S1: Clinical and pathological characteristics of the OvCa patients

| Patients No. | Age | FIGO Stage | Pathology                       | Chemotherapy |
|--------------|-----|------------|---------------------------------|--------------|
| P#1          | 32  | IV         | Low-grade adenocarcinoma        | No           |
| P#2          | 68  | IIIc       | Low-grade adenocarcinoma        | No           |
| P#3          | 59  | IIIc       | Endometrioid adenocarcinoma     | No           |
| P#4          | 55  | IIIb       | Low-grade adenocarcinoma        | No           |
| P#5          | 50  | IIIc       | Low-grade adenocarcinoma        | No           |
| P#6          | 42  | IV         | Serous papillary adenocarcinoma | No           |
| P#7          | 54  | IIc        | Endometrioid adenocarcinoma     | No           |
| P#8          | 63  | IIa        | High-grade adenocarcinoma       | No           |
| P#9          | 28  | IIIc       | Mucinous adenocarcinoma         | No           |
| P#10         | 51  | Ic         | Adenocarcinoma                  | No           |
| P#11         | 54  | IIa        | Endometrioid adenocarcinoma     | No           |
| P#12         | 45  | Ic         | Adenocarcinoma                  | No           |
| P#13         | 67  | IIIa       | High-grade adenocarcinoma       | No           |
| P#14         | 48  | IIIc       | High-grade adenocarcinoma       | No           |
| P#15         | 49  | IIIc       | High-grade adenocarcinoma       | No           |
| P#16         | 54  | IIIc       | Low-grade adenocarcinoma        | No           |
| P#17         | 61  | IIa        | Endometrioid adenocarcinoma     | No           |
| P#18         | 60  | -          | Low-grade adenocarcinoma        | No           |
| P#19         | 67  | IIb        | High-grade adenocarcinoma       | No           |
| P#20         | 39  | Ia         | Mucinous carcinoma              | No           |
| P#21         | 66  | IIb        | High-grade adenocarcinoma       | No           |

---

|      |    |      |                             |    |
|------|----|------|-----------------------------|----|
| P#22 | 60 | Ila  | High-grade adenocarcinoma   | No |
| P#23 | 48 | Ib   | Adenocarcinoma              | No |
| P#24 | 61 | IIIc | High-grade adenocarcinoma   | No |
| P#25 | 55 | -    | Adenocarcinoma              | No |
| P#26 | 51 | IIc  | Adenocarcinoma              | No |
| P#27 | -  | -    | High-grade serous carcinoma | No |
| P#28 | 67 | IIb  | Adenocarcinoma              | No |
| P#29 | 49 | IIIc | High-grade adenocarcinoma   | No |
| P#30 | 51 | IIIb | Low-grade adenocarcinoma    | No |
| P#31 | 36 | Ia   | Clear cell carcinoma        | No |
| P#32 | 46 | IIc  | High-grade serous carcinoma | No |

---
