# Supplementary material
Source: PubMed Central journal article supplement (PMC7051965)

## Supplementary Figures

Fig S1.

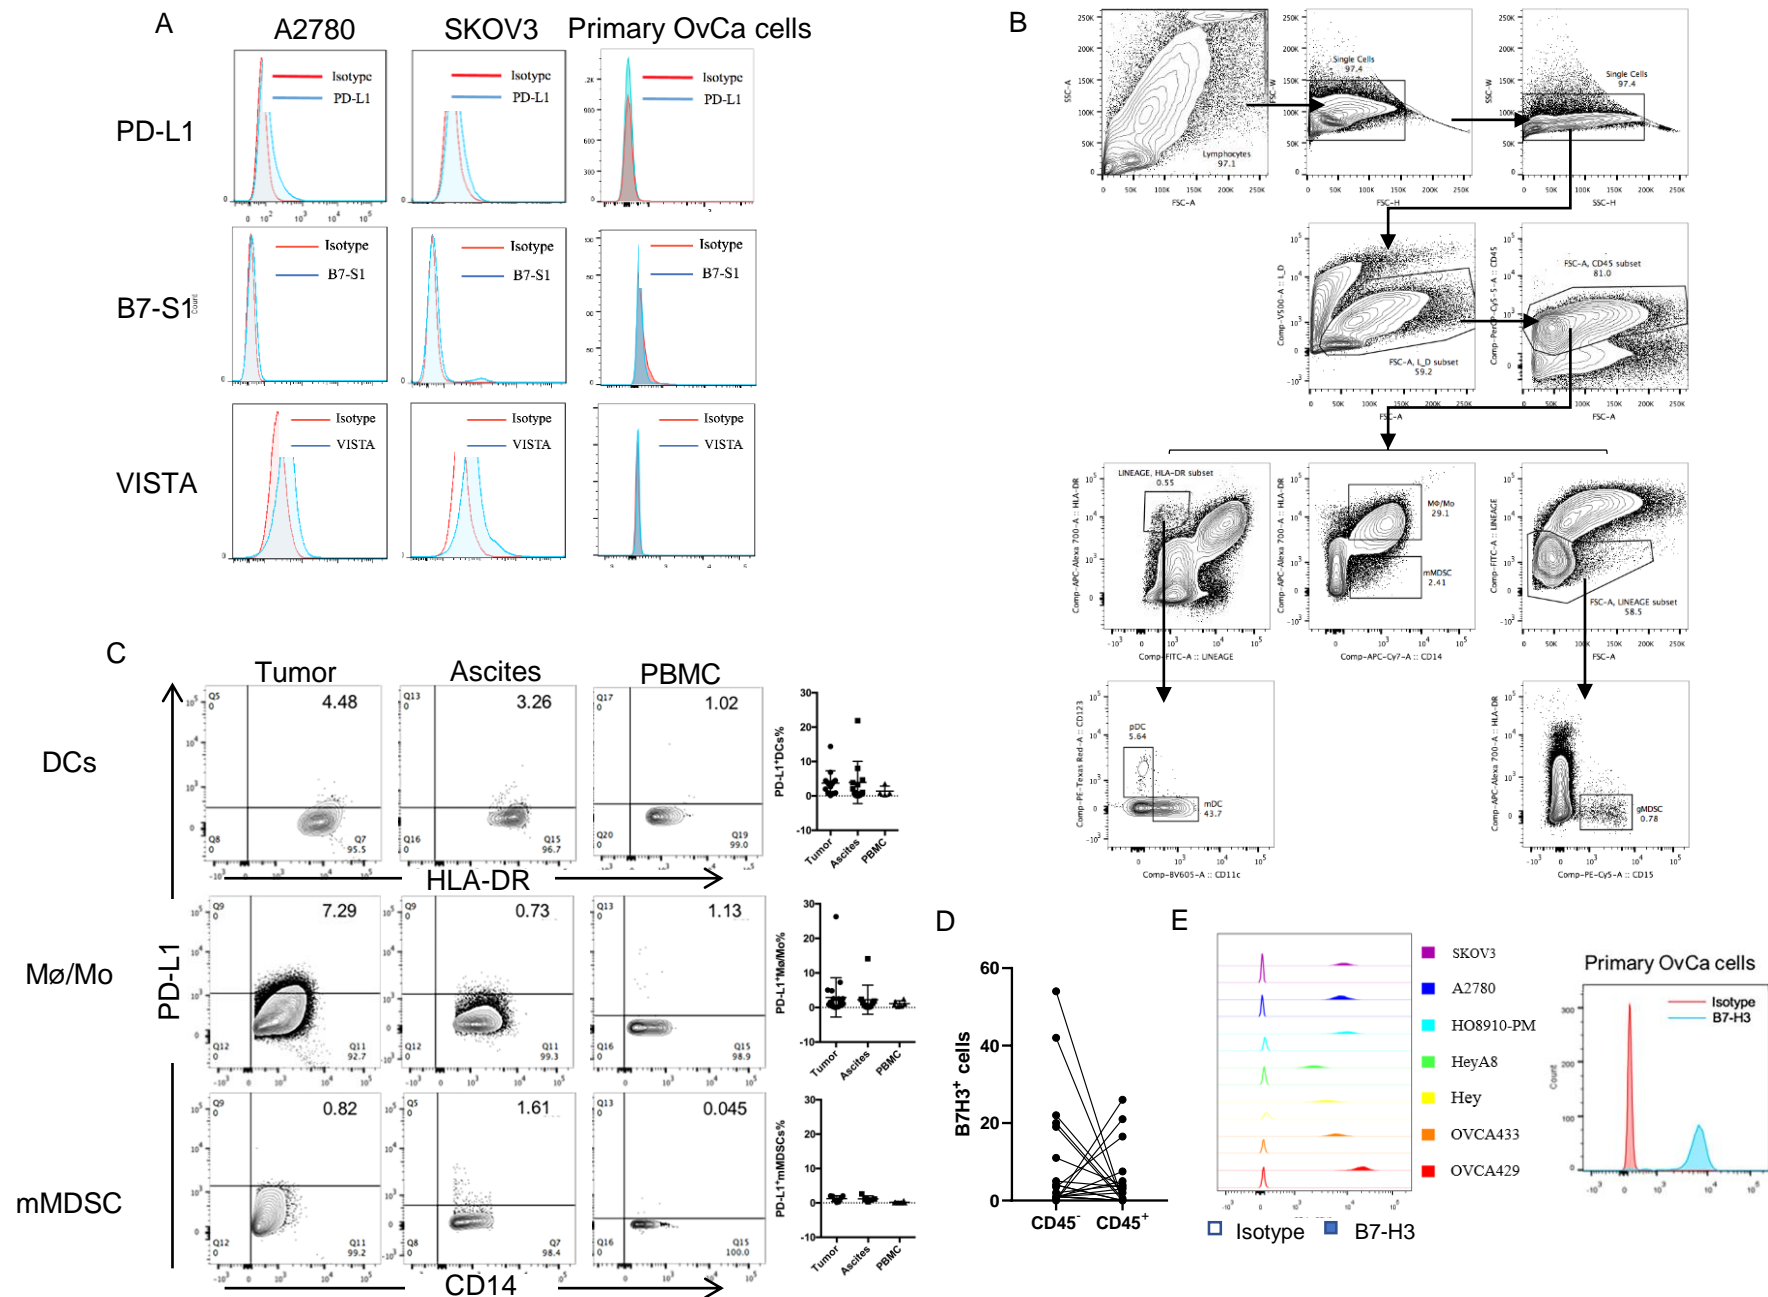

Fig S2.

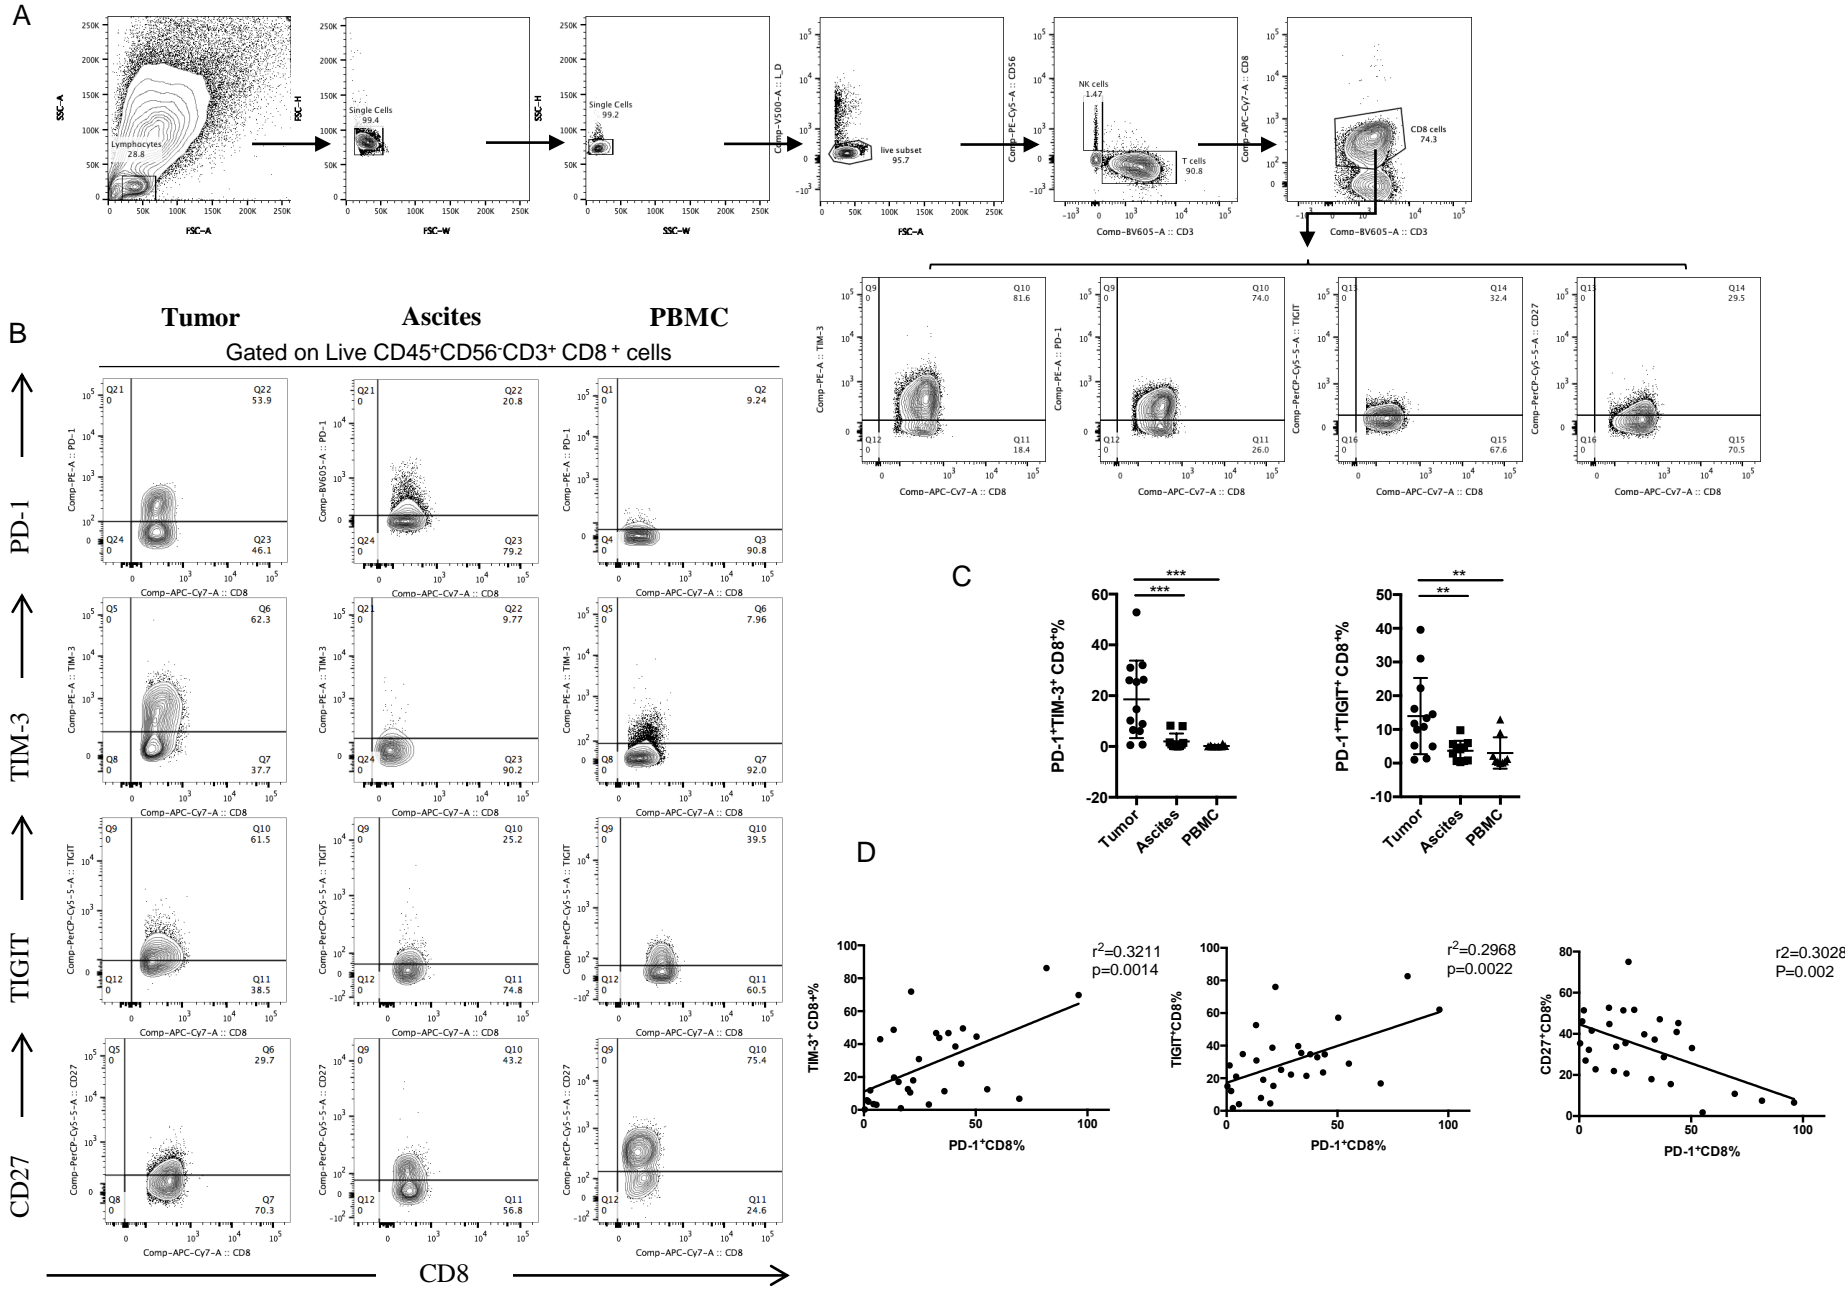



Fig S4.

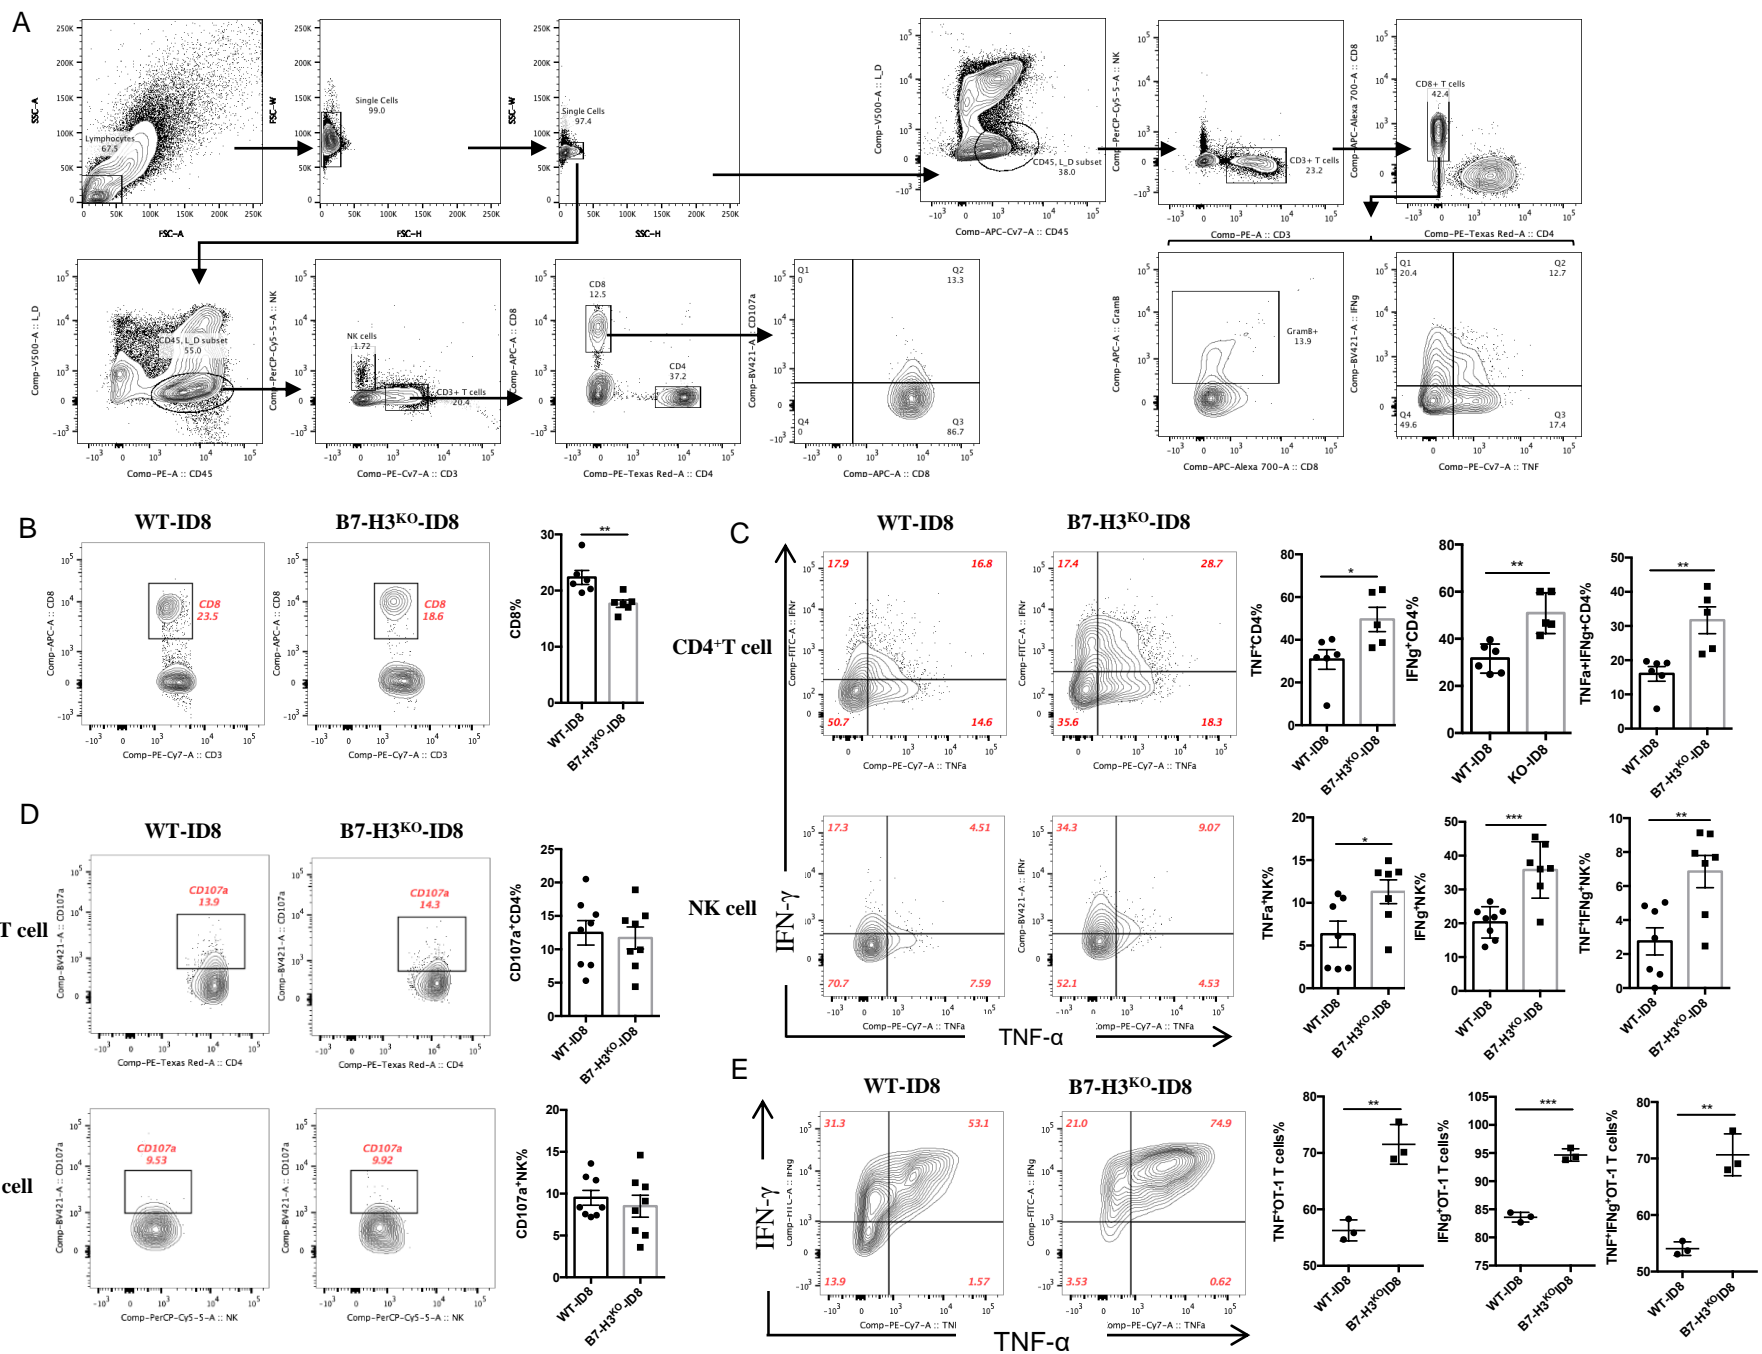

Supplement: 41423_2019_305_MOESM1_ESM.pdf [file 41423_2019_305_MOESM1_ESM.pdf]
